# Supplementary material for: Metallo-boranes: a class of unconventional superhalogens defying electron counting rules
Source: Royal Society of Chemistry journal article supplement (doi:10.1039/d1nr06929b), 2021-12-23
Supplement: d1nr06929b1.pdf [file d1nr06929b1.pdf]

## Supporting Information

### Metallo-boranes: A Class of unconventional superhalogens defying electron counting rules

Huta Banjade, Hong Fang, and Puru Jena

Physics Department, Virginia Commonwealth University, Richmond, VA 23284

**Table S1. Point group symmetries of the studied clusters and their HOMO-LUMO gap ( $\Delta G$ ) in the anionic state.**

| Cluster                                | Symmetry       | $\Delta G$ (eV) |
|----------------------------------------|----------------|-----------------|
| Zn(B <sub>12</sub> H <sub>12</sub> )   | C <sub>s</sub> | 5.91            |
| Al(BeB <sub>11</sub> H <sub>12</sub> ) | C <sub>s</sub> | 5.05            |
| ZnB <sub>12</sub> H <sub>11</sub>      | C <sub>s</sub> | 4.46            |
| AlB <sub>12</sub> H <sub>12</sub>      | C <sub>s</sub> | 7.56            |
| Zn(CB <sub>11</sub> H <sub>12</sub> )  | C <sub>1</sub> | 5.52            |
| Zn(BeB <sub>11</sub> H <sub>12</sub> ) | C <sub>1</sub> | 5.47            |
| LiB <sub>12</sub> H <sub>12</sub>      | C <sub>1</sub> | 6.03            |

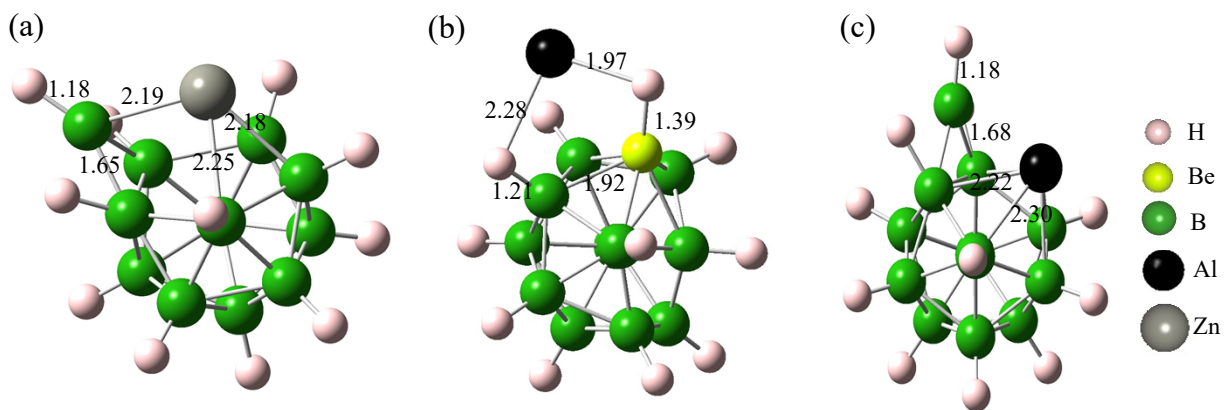

**Figure S1.** Higher energy isomer of the (a)  $\text{Zn}(\text{B}_{12}\text{H}_{12})$ , (b)  $\text{Al}(\text{BeB}_{11}\text{H}_{12})$ , and (c)  $\text{Al}(\text{B}_{12}\text{H}_{12})$  clusters. Isomer for  $\text{Al}(\text{B}_{12}\text{H}_{12})$  is 2.04 eV higher in energy than the one presented in Figure 4(b). The characteristic bond length (in Å) between different atoms is shown in the Figure.

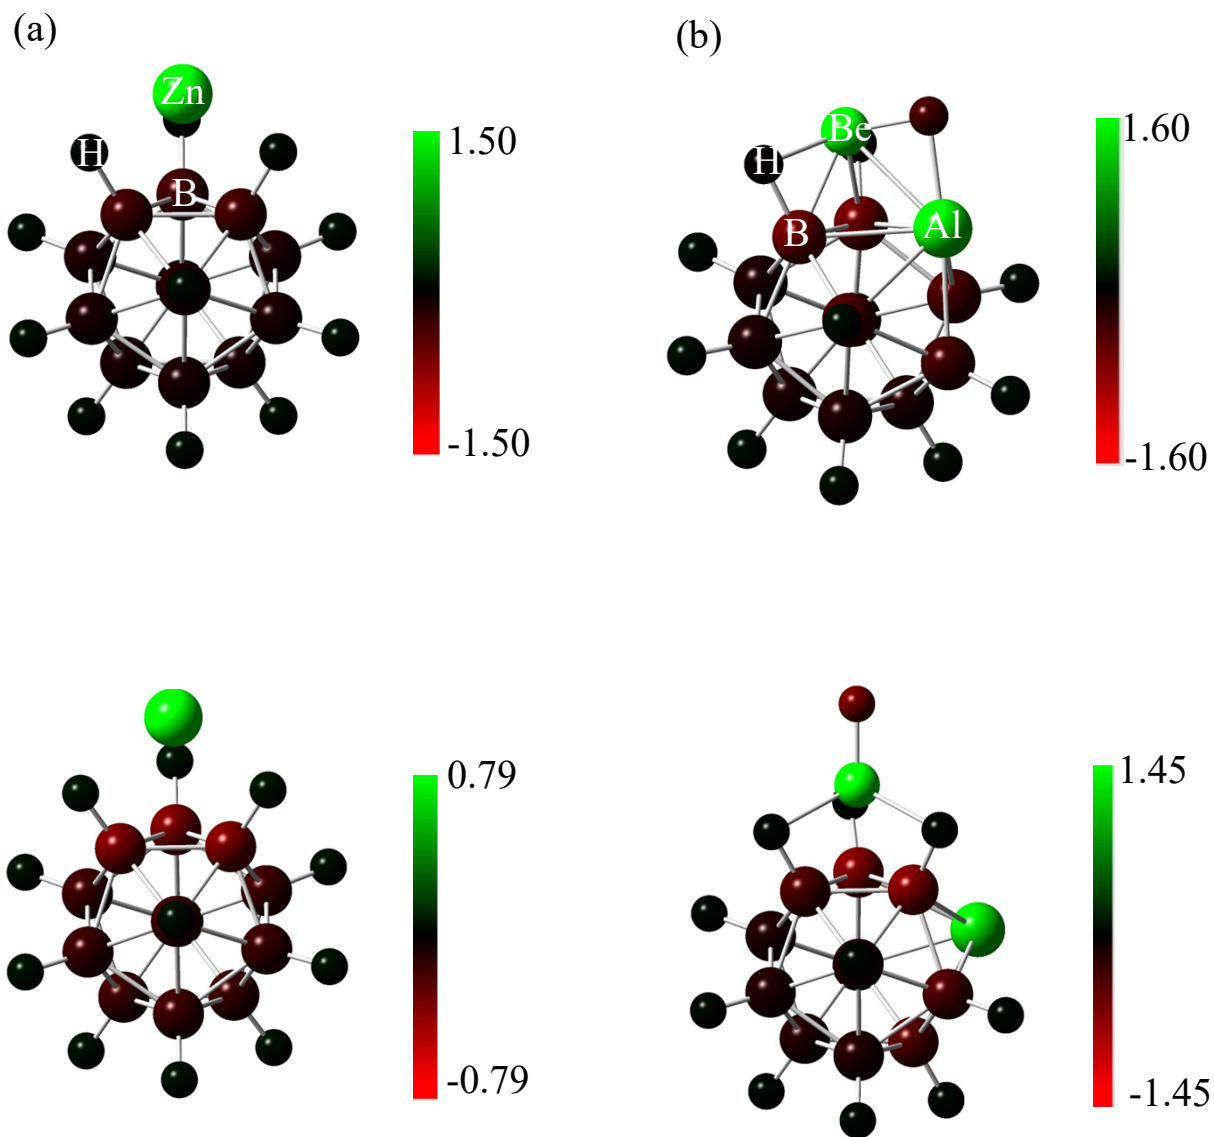

**Figure S2.** Natural charge distribution; neutral (top panel) and anion (bottom panel) in (a) Zn(B<sub>12</sub>H<sub>12</sub>), and (b) Al(BeB<sub>11</sub>H<sub>12</sub>).

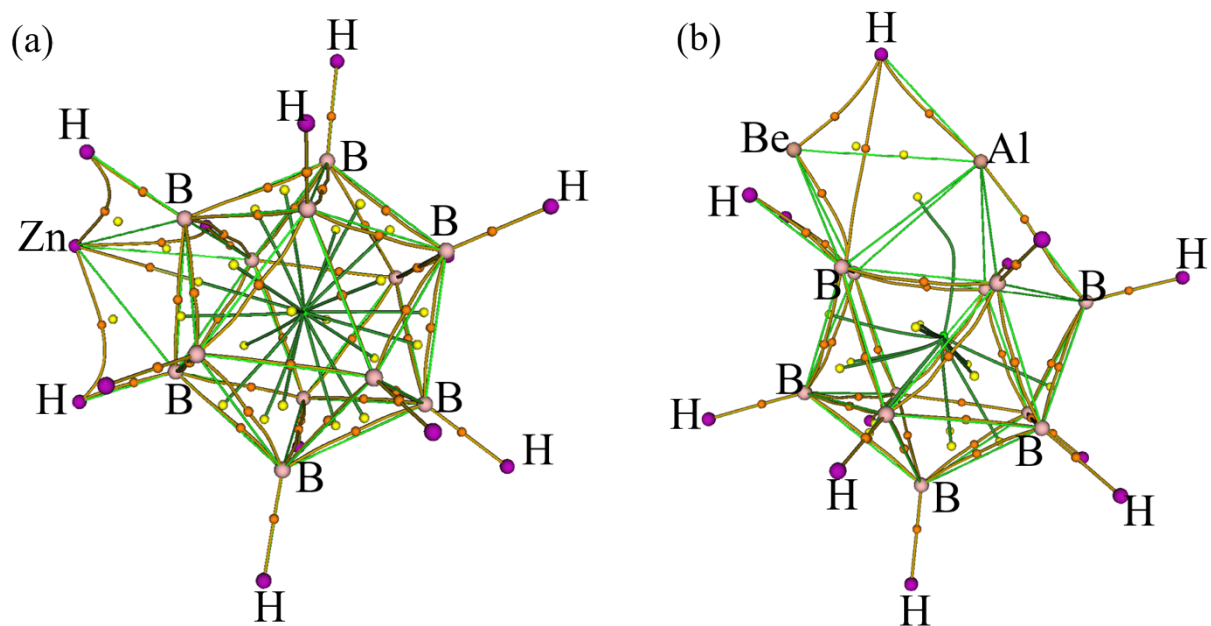

**Figure S3.** Molecular graph showing the bond critical points (orange dots), ring critical points (yellow), cage critical points (green), and the bond paths in (a) Zn(B<sub>12</sub>H<sub>12</sub>) and (b) Al(BeB<sub>11</sub>H<sub>12</sub>). Solid brown is the bond path connecting the two-atom critical point, and light green represents the bond connecting two atoms. In contrast, the dark green lines are the paths connecting the cage and ring critical points.

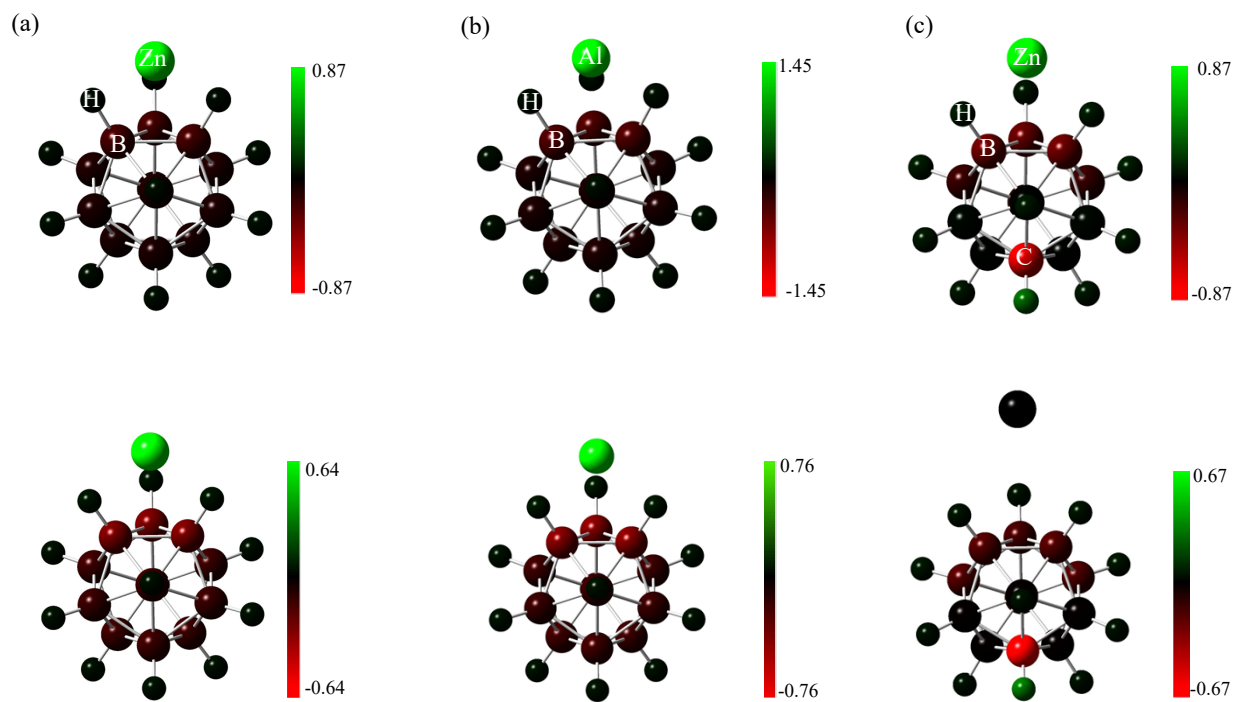

**Figure S4.** Natural charge distribution; neutral (top panel) and anion (bottom panel) in (a) Zn(B<sub>12</sub>H<sub>11</sub>), (b) Al(B<sub>12</sub>H<sub>12</sub>), and (c) Zn(CB<sub>11</sub>H<sub>12</sub>).

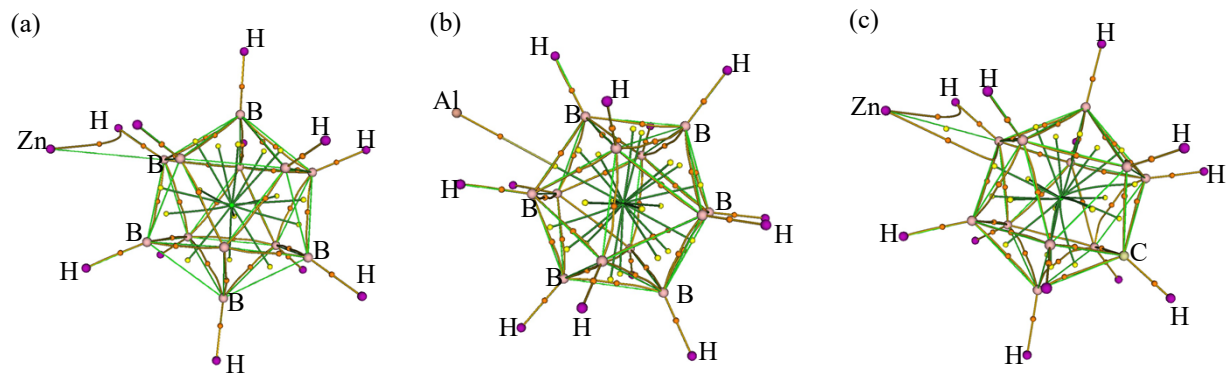

**Figure S5.** Molecular graph showing the bond critical points (orange dots), ring critical points (yellow), cage critical points (green), and the bond paths in (a)  $\text{Zn}(\text{B}_{12}\text{H}_{11})$ , (b)  $\text{Al}(\text{B}_{12}\text{H}_{12})$ , and (c)  $\text{Zn}(\text{CB}_{11}\text{H}_{12})$ . Solid brown is the bond path connecting the two-atom critical points, and light green represents the bond connecting two atoms. In contrast, dark green is the path connecting the cage and ring critical points.

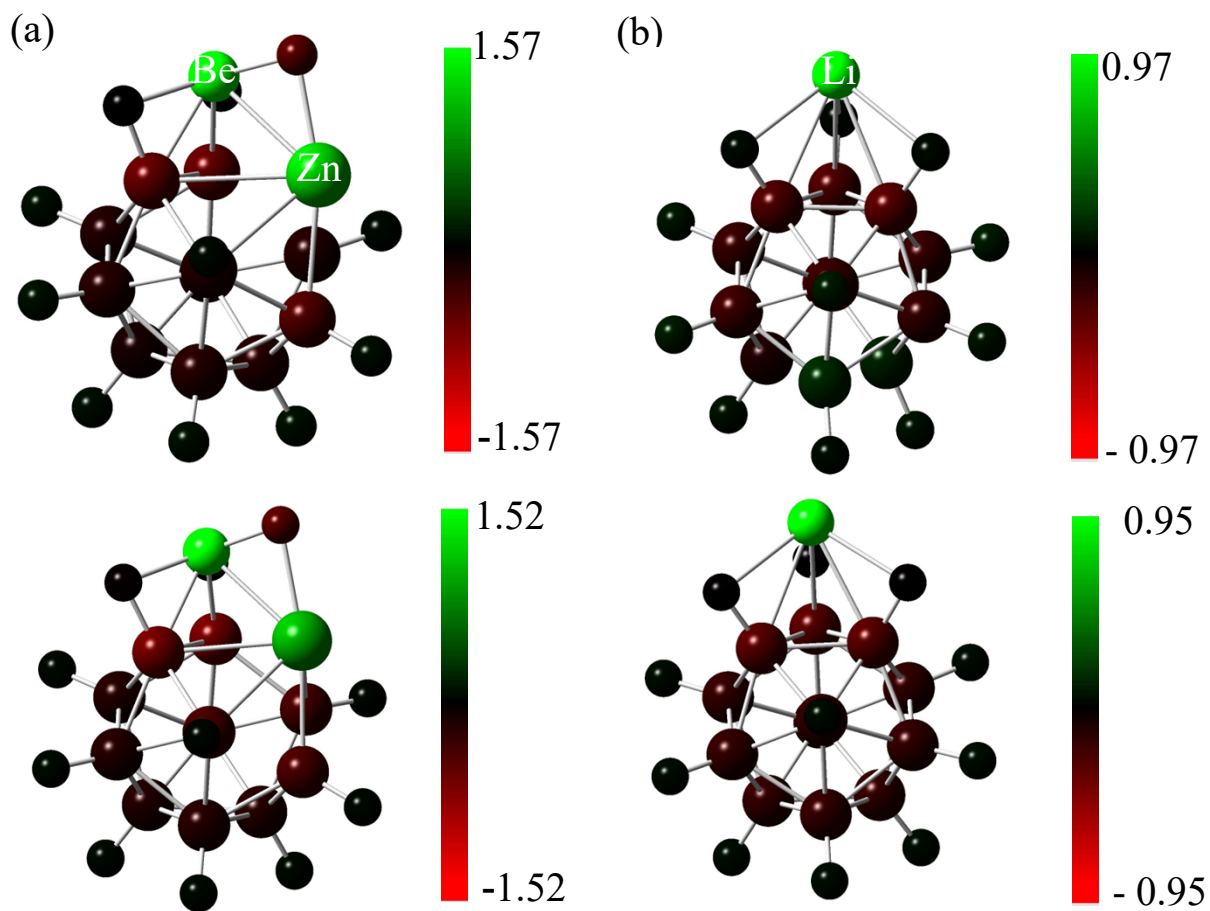

**Figure S6.** Natural charge distribution; neutral (top panel), and anion (bottom panel) in (a) Zn(BeB<sub>11</sub>H<sub>12</sub>) and (b) Li(B<sub>12</sub>H<sub>12</sub>).

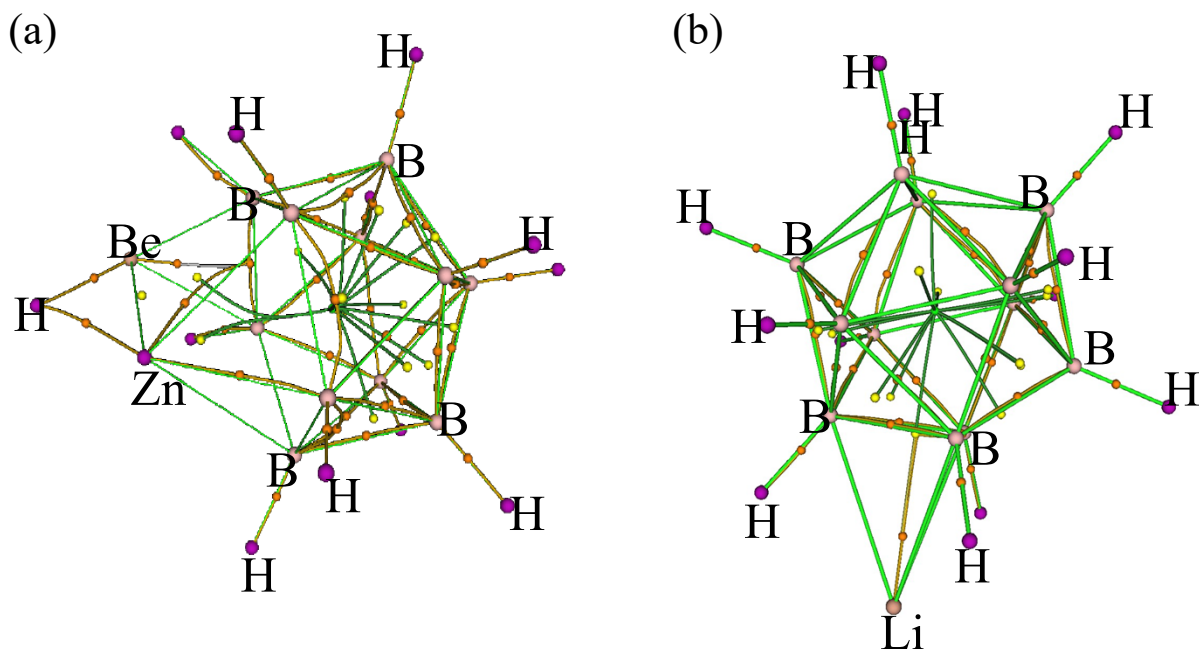

**Figure S7.** Molecular graph showing the bond critical points (orange dots), ring critical points (yellow), cage critical points (green), and the bond paths in (a)  $\text{Zn}(\text{BeB}_{11}\text{H}_{12})$ , and (b)  $\text{Li}(\text{B}_{12}\text{H}_{12})$ . Solid brown is the bond path connecting the two-atom critical point, and light green represents the bond connecting two atoms. At the same time, the dark green is the path connecting the cage and ring critical points.

### Kinetic stability test of the clusters

To test the atomic vibrational stability under thermal excitation of the clusters we performed *ab initio* molecular dynamics (AIMD) simulation of  $\text{Zn}(\text{B}_{12}\text{H}_{12})$  and  $\text{Al}(\text{B}_{12}\text{H}_{12})$  clusters by using density functional theory calculations as implemented in the Vienna *ab initio* simulation package (VASP).<sup>1</sup> Generalized gradient approximation and the Perdew-Burke-Ernzerhof (PBE)<sup>2</sup> exchange-correlation functional are used to describe the electron exchange-correlation. To avoid the interaction between the periodic images, we used a vacuum padding of 15 Å in each



direction during AIMD. The system is confined to an NVT ensemble at 300 K for 5 ps. The configurations after AIMD simulations shown in Figure S8 show the thermal stability at 300 K.

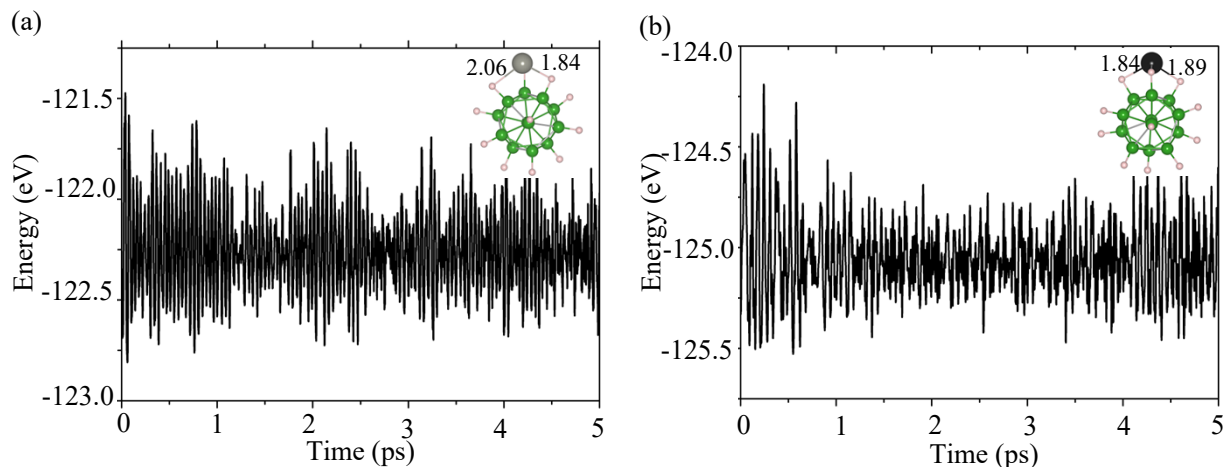

Figure S8: Energy evolutions of the Zn(B<sub>12</sub>H<sub>12</sub>) and Al(B<sub>12</sub>H<sub>12</sub>) cluster during 5 ps AIMD simulation at 300 K.

### Supplementary Reference:

- 1 G. Kresse and J. Furthmüller, Efficiency of ab-initio total energy calculations for metals and semiconductors using a plane-wave basis set, *Comput. Mater. Sci.*, 1996, **6**, 15–50.
- 2 J. P. Perdew, K. Burke and M. Ernzerhof, Generalized Gradient Approximation Made Simple, *Phys. Rev. Lett.*, 1996, **77**, 3865–3868.
